# Supplementary material
Source: PubMed Central journal article supplement (PMC9244776)
Supplement: jamasurg-e222236-s001.pdf [file jamasurg-e222236-s001.pdf]

## Supplementary Online Content

Glance LG, Benesch CG, Holloway RG, et al. Association of time elapsed since ischemic stroke with risk of recurrent stroke in older patients undergoing elective nonneurologic, noncardiac surgery. *JAMA Surg*. Published online June 29, 2022. doi:10.1001/jamasurg.2022.2236

**eFigure 1.** Flow diagram describing selection of cases in the analytic cohort

**eFigure 2.** Temporal distribution of strokes after surgery

**eFigure 3.** Risk of major adverse events and discharge to skilled nursing facility stratified by time to previous stroke in patients undergoing total hip arthroplasties or total knee arthroplasties

**eTable 1.** Surgery mortality risk categories

**eTable 2.** Model coefficients for baseline analysis

This supplementary material has been provided by the authors to give readers additional information about their work.

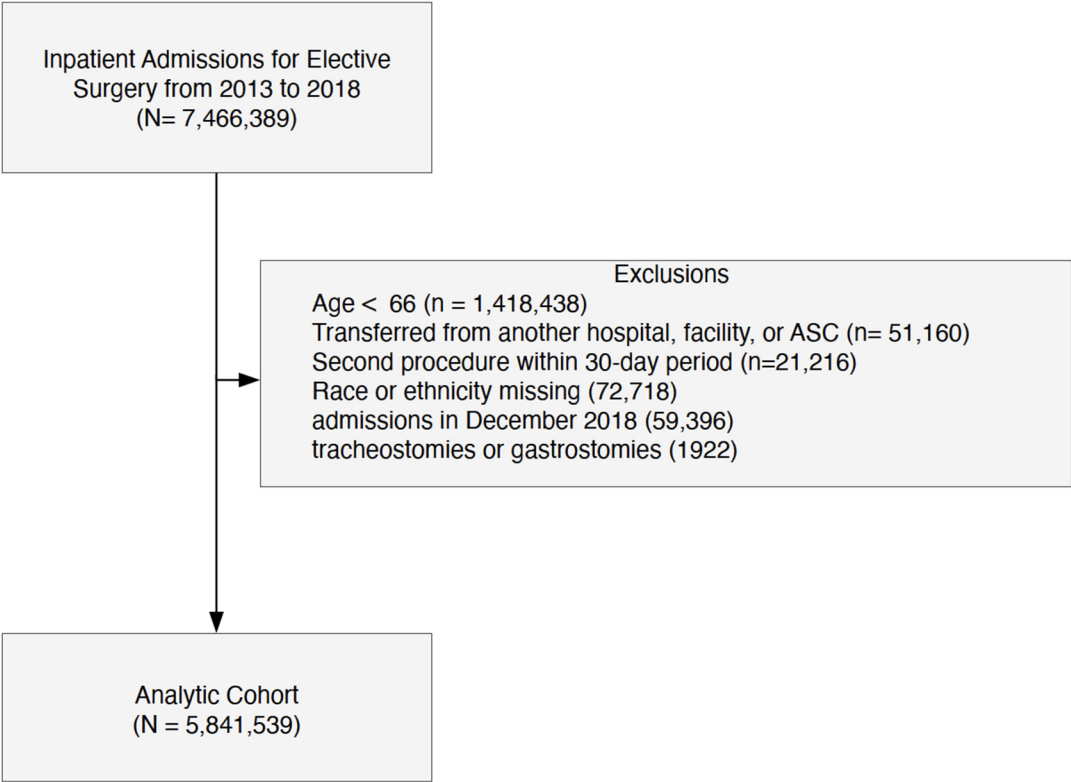

**eFigure 1.** Flow diagram describing selection of cases in the analytic cohort

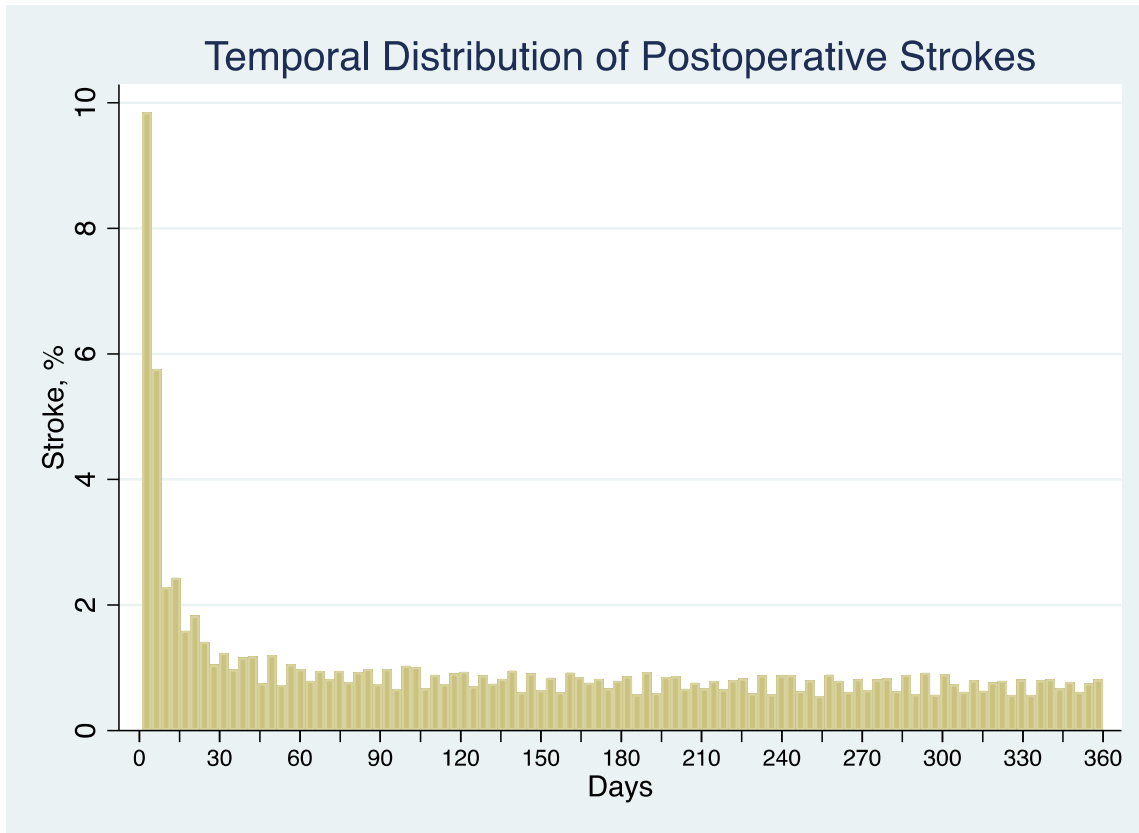

**eFigure 2.** Temporal distribution of strokes after surgery

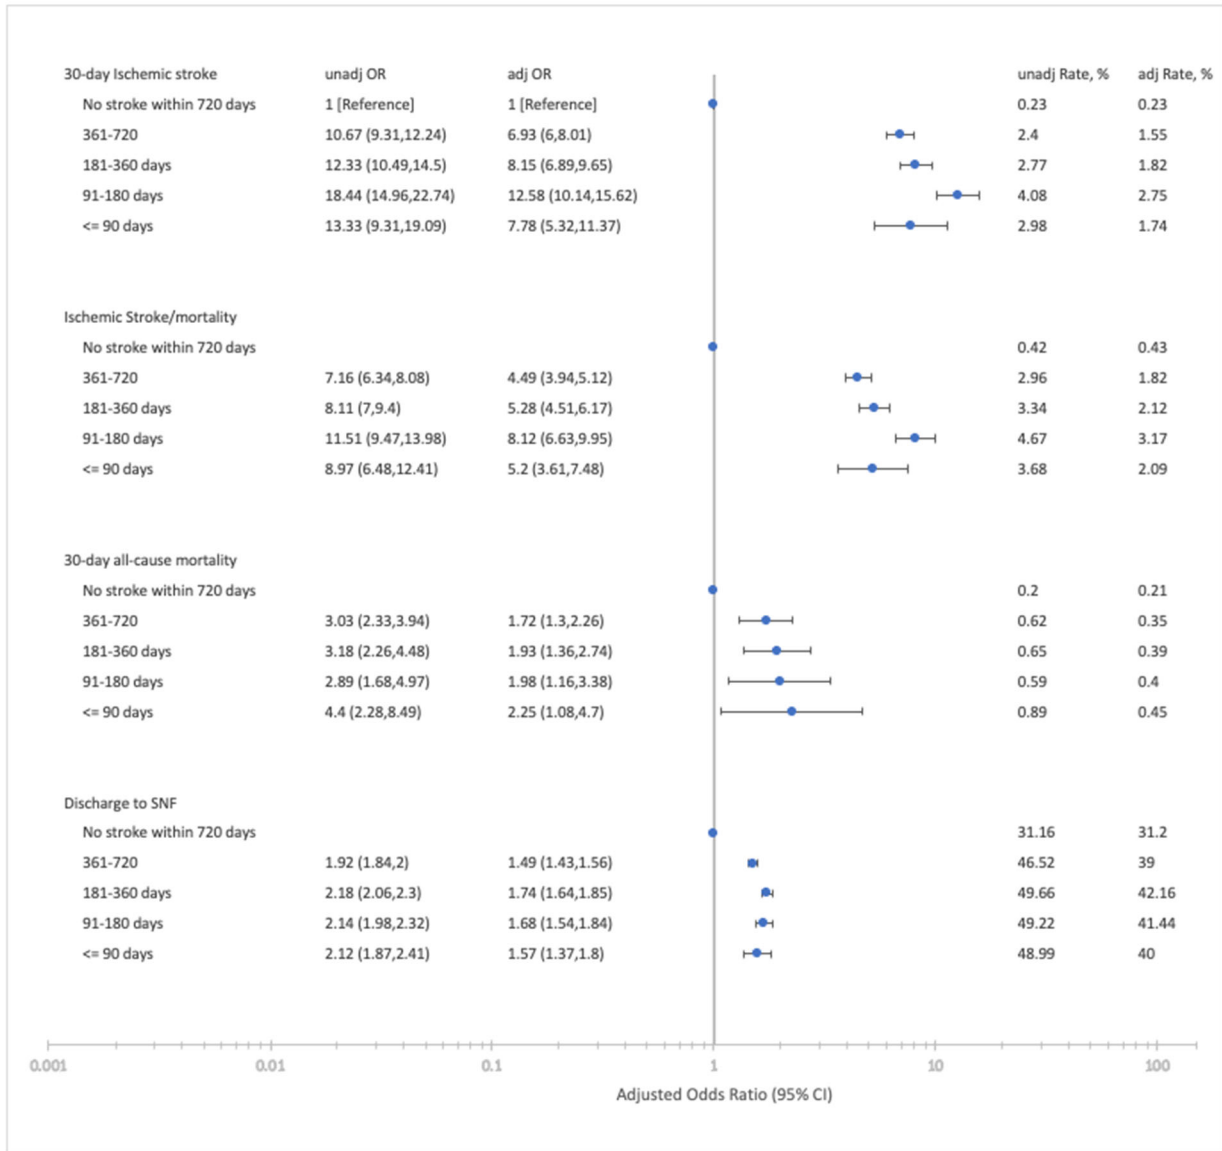

**eFigure 3.** Risk of major adverse events and discharge to skilled nursing facility stratified by time to previous stroke in patients undergoing total hip arthroplasties or total knee arthroplasties

Odds ratios adjusted for age, sex, race and ethnicity, dual eligibility, transfer from NH or SNF, comorbidities, surgical procedure, and year of admission.

| <b>eTable 1. Surgery mortality risk categories</b> |      |
|----------------------------------------------------|------|
| Surgical Procedure Classes                         | Risk |
| laminectomy                                        | 2    |
| Thyroidectomy                                      | 2    |
| Tonsillectomy                                      | 2    |
| Lobectomy or pneumonectomy                         | 3    |
| Peripheral vascular bypass                         | 3    |
| Embolectomy/endarterectomy lower limbs             | 3    |
| Procedures on spleen                               | 3    |
| Colostomy                                          | 3    |
| Ileostomy                                          | 3    |
| Gastrectomy                                        | 3    |
| Small bowel resection                              | 2    |
| Colorectal resection                               | 3    |
| Appendectomy                                       | 2    |
| Cholecystectomy                                    | 3    |
| Inguinal/femoral hernia repair                     | 3    |
| Hernia repair, other                               | 3    |
| Exploratory laparotomy                             | 3    |
| Lysis of adhesions                                 | 3    |
| Resection or removal of urinary obstruction        | 3    |
| Nephrectomy                                        | 2    |
| Kidney transplant                                  | 3    |
| TURP                                               | 2    |
| Open prostatectomy                                 | 2    |
| Oophorectomy                                       | 2    |
| Other operation on ovaries                         | 2    |
| Hysterectomy                                       | 2    |
| Repair of cystocele and rectocele                  | 1    |
| Arthroplasty, knee                                 | 1    |
| Hip replacement                                    | 1    |
| Arthroplasty, other than hip or knee               | 1    |
| Amputation of lower extremity                      | 3    |
| Spinal fusion                                      | 2    |

\* Surgery risk categories: 1 – mortality risk <0.5%; 2 - >0.5-1.0%; 3 - > 1.0%

**eTable 2.** Model coefficients for baseline analysis

| Patient Characteristics   | 30-day Stroke |             |         | 30-day Stroke or Mortality |             |         | 30-day Mortality |             |         | Discharge to SNF |             |         |
|---------------------------|---------------|-------------|---------|----------------------------|-------------|---------|------------------|-------------|---------|------------------|-------------|---------|
|                           | Odds Ratio    | 95% CI      | P value | Odds Ratio                 | 95% CI      | P value | Odds Ratio       | 95% CI      | P value | Odds Ratio       | 95% CI      | P value |
| Time to prior CVA         |               |             |         |                            |             |         |                  |             |         |                  |             |         |
| No stroke within 720 days | reference     |             |         | reference                  |             |         | reference        |             |         | reference        |             |         |
| 361-720 days              | 4.02          | (3.66,4.42) | <0.001  | 2.28                       | (2.12,2.46) | <0.001  | 1.48             | (1.35,1.62) | <0.001  | 1.48             | (1.43,1.53) | <0.001  |
| >180 days                 | 4.76          | (4.26,5.32) | <0.001  | 2.49                       | (2.28,2.72) | <0.001  | 1.49             | (1.32,1.68) | <0.001  | 1.65             | (1.58,1.72) | <0.001  |
| 91-180 days               | 5.83          | (5.09,6.69) | <0.001  | 2.77                       | (2.47,3.11) | <0.001  | 1.47             | (1.25,1.73) | <0.001  | 1.64             | (1.55,1.74) | <0.001  |
| 61-90 days                | 5.01          | (4,6.29)    | <0.001  | 2.49                       | (2.07,3.01) | <0.001  | 1.49             | (1.15,1.92) | 0.002   | 1.64             | (1.48,1.81) | <0.001  |
| 31-60 days                | 6.25          | (5.07,7.71) | <0.001  | 2.97                       | (2.5,3.54)  | <0.001  | 1.65             | (1.29,2.1)  | <0.001  | 1.75             | (1.57,1.95) | <0.001  |
| <= 30 days                | 8.02          | (6.37,10.1) | <0.001  | 4.05                       | (3.36,4.88) | <0.001  | 2.51             | (1.99,3.16) | <0.001  | 3.09             | (2.71,3.53) | <0.001  |
| Age                       |               |             |         |                            |             |         |                  |             |         |                  |             |         |
| 66-69                     | reference     |             |         | reference                  |             |         | reference        |             |         | reference        |             |         |
| 70-74                     | 1.29          | (1.24,1.35) | <0.001  | 1.27                       | (1.23,1.3)  | <0.001  | 1.25             | (1.22,1.29) | <0.001  | 1.42             | (1.4,1.43)  | <0.001  |
| 75-79                     | 1.73          | (1.66,1.81) | <0.001  | 1.64                       | (1.59,1.68) | <0.001  | 1.59             | (1.54,1.64) | <0.001  | 2.19             | (2.17,2.22) | <0.001  |
| 80-84                     | 2.25          | (2.14,2.35) | <0.001  | 2.20                       | (2.14,2.26) | <0.001  | 2.17             | (2.1,2.25)  | <0.001  | 3.70             | (3.64,3.76) | <0.001  |
| 85 -                      | 2.73          | (2.59,2.88) | <0.001  | 3.32                       | (3.22,3.42) | <0.001  | 3.53             | (3.41,3.66) | <0.001  | 6.98             | (6.83,7.12) | <0.001  |
| Sex                       |               |             |         |                            |             |         |                  |             |         |                  |             |         |
| female                    | reference     |             |         | reference                  |             |         | reference        |             |         | reference        |             |         |
| male                      | 0.93          | (0.9,0.95)  | <0.001  | 1.10                       | (1.08,1.12) | <0.001  | 1.18             | (1.15,1.21) | <0.001  | 0.59             | (0.59,0.6)  | <0.001  |
| Race and ethnicity        |               |             |         |                            |             |         |                  |             |         |                  |             |         |
| non-Hispanic White        | reference     |             |         | reference                  |             |         | reference        |             |         |                  |             |         |
| Black                     | 1.19          | (1.13,1.26) | 0       | 1.28                       | (1.23,1.33) | <0.001  | 1.32             | (1.26,1.38) | <0.001  | 0.98             | (0.91,1.06) | 0.664   |
| Hispanic                  | 0.83          | (0.77,0.9)  | <0.001  | 1.14                       | (1.09,1.2)  | <0.001  | 1.32             | (1.24,1.39) | <0.001  | 1.11             | (1,1.22)    | 0.057   |
| Asian                     | 0.90          | (0.8,1.01)  | 0.076   | 0.94                       | (0.86,1.02) | 0.154   | 0.98             | (0.88,1.09) | 0.693   | 0.69             | (0.62,0.78) | <0.001  |

|                                 |      |             |        |      |             |        |      |             |        |       |             |        |
|---------------------------------|------|-------------|--------|------|-------------|--------|------|-------------|--------|-------|-------------|--------|
| Native American/Alaska          | 1.05 | (0.86,1.3)  | 0.626  | 1.56 | (1.41,1.74) | <0.001 | 1.84 | (1.64,2.08) | <0.001 | 1.09  | (1.02,1.16) | 0.009  |
| Other                           | 1.08 | (0.91,1.28) | 0.393  | 1.01 | (0.91,1.13) | 0.812  | 0.97 | (0.85,1.11) | 0.705  | 0.00  | (0,0)       | <0.001 |
| Dual eligibility                | 1.18 | (1.12,1.24) | <0.001 | 0.37 | (0.36,0.39) | <0.001 | 0.10 | (0.09,0.11) | <0.001 | 0.02  | (2,0)       | 1.909  |
| Transfer from NH/SNF            | 1.18 | (0.98,1.42) | <0.001 | 2.02 | (1.84,2.22) | <0.001 | 2.44 | (2.19,2.72) | <0.001 | 15.69 | (9.62,25.6) | <0.001 |
| Comorbidities                   |      |             |        |      |             |        |      |             |        |       |             |        |
| CHF                             | 1.33 | (1.27,1.39) | <0.001 | 1.66 | (1.62,1.71) | <0.001 | 1.78 | (1.73,1.83) | <0.001 | 1.49  | (1.47,1.51) | <0.001 |
| Cardiac arrhythmias             | 1.63 | (1.58,1.69) | <0.001 | 1.67 | (1.64,1.71) | <0.001 | 1.70 | (1.66,1.74) | <0.001 | 1.32  | (1.31,1.33) | <0.001 |
| Valvular disease                | 1.33 | (1.27,1.39) | <0.001 | 1.08 | (1.05,1.11) | <0.001 | 0.99 | (0.96,1.02) | 0.598  | 1.01  | (0.99,1.02) | 0.283  |
| Pulmonary circulation disorders | 1.34 | (1.25,1.44) | <0.001 | 1.62 | (1.56,1.69) | <0.001 | 1.70 | (1.63,1.78) | <0.001 | 1.28  | (1.25,1.31) | <0.001 |
| Peripheral vascular disease     | 1.52 | (1.45,1.59) | <0.001 | 1.50 | (1.45,1.54) | <0.001 | 1.47 | (1.42,1.52) | <0.001 | 1.01  | (0.97,1.06) | 0.544  |
| Hypertension, uncomplicated     | 1.25 | (1.2,1.29)  | <0.001 | 0.95 | (0.93,0.97) | <0.001 | 0.84 | (0.82,0.86) | <0.001 | 1.08  | (1.07,1.09) | <0.001 |
| Chronic pulmonary disease       | 1.06 | (1.02,1.1)  | 0.001  | 1.26 | (1.24,1.29) | <0.001 | 1.35 | (1.32,1.38) | <0.001 | 1.23  | (1.22,1.24) | <0.001 |
| Diabetes, uncomplicated         | 1.25 | (1.2,1.29)  | <0.001 | 1.18 | (1.16,1.21) | <0.001 | 1.15 | (1.12,1.18) | <0.001 | 1.32  | (1.3,1.33)  | <0.001 |
| Diabetes, complicated           | 1.40 | (1.33,1.48) | <0.001 | 1.19 | (1.15,1.22) | <0.001 | 1.11 | (1.07,1.14) | <0.001 | 1.56  | (1.52,1.59) | <0.001 |
| Hypothyroidism                  | 0.91 | (0.88,0.95) | <0.001 | 0.92 | (0.9,0.94)  | <0.001 | 0.92 | (0.89,0.94) | <0.001 | 1.05  | (1.05,1.06) | <0.001 |
| Renal failure                   | 1.19 | (1.12,1.27) | <0.001 | 1.35 | (1.3,1.39)  | <0.001 | 1.38 | (1.33,1.43) | <0.001 | 1.17  | (1.15,1.2)  | <0.001 |
| Liver disease                   | 1.17 | (1.08,1.26) | <0.001 | 2.32 | (2.24,2.4)  | <0.001 | 2.68 | (2.57,2.79) | <0.001 | 1.04  | (1.01,1.06) | 0.001  |
| Peptic ulcer disease            | 1.16 | (1,1.34)    | 0.043  | 1.06 | (0.98,1.15) | 0.144  | 1.03 | (0.94,1.12) | 0.585  | 1.16  | (1.12,1.2)  | <0.001 |
| AIDS/HIV                        | 3.90 | (3.54,4.29) | <0.001 | 2.64 | (2.49,2.8)  | <0.001 | 2.12 | (1.98,2.28) | <0.001 | 1.79  | (1.71,1.87) | <0.001 |
| Lymphoma                        | 0.94 | (0.79,1.12) | 0.499  | 1.12 | (1.03,1.22) | 0.008  | 1.15 | (1.05,1.27) | 0.003  | 1.12  | (1.08,1.15) | <0.001 |
| Metastatic cancer               | 1.10 | (1.02,1.18) | 0.014  | 1.62 | (1.54,1.69) | <0.001 | 1.75 | (1.66,1.84) | <0.001 | 1.22  | (1.18,1.27) | <0.001 |
| Solid tumor without metastasis  | 1.06 | (1,1.12)    | 0.038  | 1.18 | (1.15,1.21) | <0.001 | 1.21 | (1.17,1.24) | <0.001 | 1.01  | (0.99,1.03) | 0.189  |
| Rheumatoid arthritis            | 0.99 | (0.93,1.06) | 0.765  | 1.07 | (1.03,1.11) | <0.001 | 1.12 | (1.07,1.18) | <0.001 | 1.17  | (1.16,1.19) | <0.001 |
| Coagulopathy                    | 1.53 | (1.44,1.61) | <0.001 | 2.06 | (1.99,2.13) | <0.001 | 2.21 | (2.13,2.3)  | <0.001 | 1.51  | (1.47,1.55) | <0.001 |
| Obesity                         | 0.94 | (0.9,0.98)  | 0.005  | 0.88 | (0.85,0.91) | <0.001 | 0.84 | (0.81,0.87) | <0.001 | 1.31  | (1.28,1.34) | <0.001 |
| Weight loss                     | 1.70 | (1.59,1.81) | <0.001 | 2.16 | (2.09,2.23) | <0.001 | 2.18 | (2.1,2.26)  | <0.001 | 2.76  | (2.67,2.84) | <0.001 |
| Fluid and electrolyte disorder  | 1.85 | (1.78,1.92) | <0.001 | 2.85 | (2.79,2.92) | <0.001 | 3.38 | (3.29,3.47) | <0.001 | 1.85  | (1.81,1.89) | <0.001 |
| Blood loss anemia               | 1.07 | (0.95,1.2)  | 0.287  | 1.01 | (0.95,1.07) | 0.796  | 0.99 | (0.92,1.07) | 0.840  | 1.45  | (1.39,1.51) | <0.001 |
| Deficiency anemia               | 1.00 | (0.92,1.09) | 0.979  | 0.89 | (0.85,0.94) | <0.001 | 0.86 | (0.81,0.91) | <0.001 | 1.21  | (1.19,1.24) | <0.001 |
| Alcohol abuse                   | 1.50 | (1.36,1.66) | <0.001 | 1.20 | (1.13,1.27) | <0.001 | 1.11 | (1.04,1.19) | 0.002  | 1.52  | (1.47,1.56) | <0.001 |

|                                             |           |             |        |           |             |        |           |             |        |      |             |        |
|---------------------------------------------|-----------|-------------|--------|-----------|-------------|--------|-----------|-------------|--------|------|-------------|--------|
| Drug abuse                                  | 1.13      | (0.99,1.3)  | 0.070  | 0.98      | (0.9,1.06)  | 0.564  | 0.90      | (0.81,1)    | 0.050  | 1.73 | (1.66,1.8)  | <0.001 |
| Psychoses                                   | 1.45      | (1.25,1.7)  | <0.001 | 1.43      | (1.29,1.57) | <0.001 | 1.40      | (1.25,1.57) | <0.001 | 3.05 | (2.94,3.17) | <0.001 |
| Depression                                  | 1.18      | (1.14,1.23) | <0.001 | 1.09      | (1.06,1.11) | <0.001 | 1.03      | (0.99,1.06) | 0.105  | 1.46 | (1.44,1.47) | <0.001 |
| Hypertension, complicated                   | 1.22      | (1.15,1.3)  | <0.001 | 0.95      | (0.92,0.98) | 0.003  | 0.88      | (0.85,0.92) | <0.001 | 1.06 | (1.04,1.09) | <0.001 |
| Surgical Procedure Classes                  |           |             |        |           |             |        |           |             |        |      |             |        |
| laminectomy                                 | reference |             |        | reference |             |        | reference |             |        |      |             |        |
| Thyroidectomy                               | 1.12      | (0.91,1.38) | 0.295  | 0.87      | (0.77,0.98) | 0.018  | 0.79      | (0.68,0.9)  | 0.001  | 0.34 | (0.32,0.38) | <0.001 |
| Tonsillectomy                               | 1.72      | (1.11,2.66) | 0.015  | 1.13      | (0.85,1.48) | 0.399  | 0.99      | (0.71,1.38) | 0.934  | 0.65 | (0.55,0.76) | <0.001 |
| Lobectomy or pneumonectomy                  | 1.47      | (1.34,1.61) | <0.001 | 1.33      | (1.26,1.4)  | <0.001 | 1.30      | (1.23,1.38) | <0.001 | 0.68 | (0.65,0.72) | <0.001 |
| Peripheral vascular bypass                  | 1.52      | (1.41,1.64) | <0.001 | 1.29      | (1.23,1.34) | <0.001 | 1.19      | (1.14,1.25) | <0.001 | 1.84 | (1.76,1.93) | <0.001 |
| Embolectomy/endarterectomy lower limbs      | 1.13      | (1.04,1.22) | 0.002  | 1.28      | (1.23,1.34) | <0.001 | 1.33      | (1.27,1.4)  | <0.001 | 0.92 | (0.88,0.96) | <0.001 |
| Procedures on spleen                        | 1.51      | (1.29,1.77) | <0.001 | 1.34      | (1.24,1.44) | <0.001 | 1.28      | (1.17,1.39) | <0.001 | 1.07 | (1,1.14)    | 0.046  |
| Colostomy                                   | 1.31      | (1.16,1.48) | <0.001 | 1.99      | (1.89,2.1)  | <0.001 | 2.09      | (1.97,2.21) | <0.001 | 3.12 | (3.02,3.23) | <0.001 |
| Ileostomy                                   | 1.55      | (1.4,1.72)  | <0.001 | 2.04      | (1.93,2.14) | <0.001 | 2.04      | (1.93,2.16) | <0.001 | 2.45 | (2.34,2.56) | <0.001 |
| Gastrectomy                                 | 0.82      | (0.72,0.94) | 0.005  | 0.94      | (0.89,1)    | 0.059  | 0.97      | (0.91,1.04) | 0.405  | 0.66 | (0.63,0.7)  | <0.001 |
| Small bowel resection                       | 1.09      | (0.94,1.26) | 0.251  | 0.95      | (0.89,1.01) | 0.081  | 0.89      | (0.84,0.96) | 0.001  | 1.16 | (1.11,1.2)  | <0.001 |
| Colorectal resection                        | 1.06      | (0.99,1.13) | 0.106  | 1.04      | (1.01,1.08) | 0.009  | 1.04      | (1,1.08)    | 0.028  | 0.75 | (0.73,0.77) | <0.001 |
| Appendectomy                                | 1.07      | (0.91,1.26) | 0.423  | 0.98      | (0.91,1.06) | 0.677  | 0.96      | (0.88,1.05) | 0.343  | 1.09 | (1.04,1.14) | <0.001 |
| Cholecystectomy                             | 1.02      | (0.93,1.13) | 0.612  | 1.13      | (1.09,1.19) | <0.001 | 1.14      | (1.08,1.2)  | <0.001 | 0.84 | (0.81,0.88) | <0.001 |
| Inguinal/femoral hernia repair              | 1.03      | (0.85,1.24) | 0.767  | 1.11      | (1.02,1.21) | 0.021  | 1.10      | (1,1.21)    | 0.044  | 1.03 | (0.99,1.09) | 0.157  |
| Hernia repair, other                        | 0.95      | (0.86,1.04) | 0.248  | 1.01      | (0.96,1.05) | 0.796  | 1.02      | (0.97,1.08) | 0.360  | 0.75 | (0.72,0.77) | <0.001 |
| Exploratory laparotomy                      | 1.41      | (1.14,1.76) | 0.002  | 4.22      | (3.9,4.57)  | <0.001 | 4.78      | (4.39,5.2)  | <0.001 | 1.24 | (1.16,1.33) | <0.001 |
| Lysis of adhesions                          | 0.98      | (0.91,1.06) | 0.644  | 1.06      | (1.03,1.1)  | 0.001  | 1.08      | (1.04,1.12) | <0.001 | 1.05 | (1.03,1.07) | <0.001 |
| Resection or removal of urinary obstruction | 1.08      | (0.96,1.23) | 0.208  | 1.32      | (1.25,1.39) | <0.001 | 1.34      | (1.27,1.42) | <0.001 | 0.81 | (0.78,0.84) | <0.001 |
| Nephrectomy                                 | 1.05      | (0.94,1.18) | 0.387  | 0.85      | (0.8,0.9)   | <0.001 | 0.79      | (0.74,0.85) | <0.001 | 0.68 | (0.65,0.7)  | <0.001 |
| Kidney transplant                           | 1.28      | (0.56,2.89) | 0.557  | 0.75      | (0.51,1.12) | 0.158  | 0.62      | (0.38,1.01) | 0.053  | 0.25 | (0.18,0.34) | <0.001 |
| TURP                                        | 1.17      | (1.02,1.33) | 0.027  | 0.78      | (0.72,0.84) | <0.001 | 0.67      | (0.62,0.73) | <0.001 | 0.56 | (0.53,0.59) | <0.001 |
| Open prostatectomy                          | 0.92      | (0.8,1.06)  | 0.235  | 0.68      | (0.63,0.74) | <0.001 | 0.61      | (0.56,0.67) | <0.001 | 0.47 | (0.44,0.5)  | <0.001 |
| Oophorectomy                                | 0.90      | (0.76,1.07) | 0.245  | 0.86      | (0.79,0.93) | <0.001 | 0.86      | (0.78,0.94) | 0.001  | 0.78 | (0.75,0.81) | <0.001 |



|                                      |           |             |        |           |             |        |           |             |        |      |             |        |
|--------------------------------------|-----------|-------------|--------|-----------|-------------|--------|-----------|-------------|--------|------|-------------|--------|
| Other operation on ovaries           | 0.98      | (0.62,1.54) | 0.935  | 0.97      | (0.76,1.23) | 0.790  | 0.98      | (0.75,1.28) | 0.873  | 0.87 | (0.8,0.96)  | 0.004  |
| Hysterectomy                         | 1.02      | (0.85,1.23) | 0.838  | 0.86      | (0.78,0.95) | 0.002  | 0.82      | (0.74,0.91) | <0.001 | 0.66 | (0.63,0.69) | <0.001 |
| Repair of cystocele and rectocele    | 0.48      | (0.35,0.67) | <0.001 | 0.38      | (0.31,0.47) | <0.001 | 0.35      | (0.27,0.45) | <0.001 | 0.18 | (0.16,0.2)  | <0.001 |
| Arthroplasty, knee                   | 0.83      | (0.78,0.89) | <0.001 | 0.42      | (0.4,0.43)  | <0.001 | 0.25      | (0.24,0.27) | <0.001 | 4.24 | (4.07,4.42) | <0.001 |
| Hip replacement                      | 1.03      | (0.96,1.1)  | 0.474  | 0.59      | (0.56,0.61) | <0.001 | 0.43      | (0.41,0.45) | <0.001 | 4.17 | (4,4.34)    | <0.001 |
| Arthroplasty, other than hip or knee | 0.71      | (0.64,0.77) | <0.001 | 0.42      | (0.4,0.45)  | <0.001 | 0.31      | (0.28,0.33) | <0.001 | 1.37 | (1.32,1.42) | <0.001 |
| Amputation of lower extremity        | 1.14      | (1.04,1.25) | 0.006  | 1.70      | (1.62,1.78) | <0.001 | 1.87      | (1.77,1.97) | <0.001 | 8.54 | (8.16,8.94) | <0.001 |
| Spinal fusion                        | 1.40      | (1.31,1.5)  | <0.001 | 0.82      | (0.79,0.86) | <0.001 | 0.61      | (0.58,0.64) | <0.001 | 3.88 | (3.74,4.03) | <0.001 |
| Year                                 |           |             |        |           |             |        |           |             |        |      |             |        |
| 2013                                 | reference |             |        | reference |             |        | reference |             |        |      |             |        |
| 2014                                 | 0.98      | (0.93,1.03) | 0.397  | 0.99      | (0.96,1.01) | 0.352  | 0.99      | (0.96,1.02) | 0.527  | 0.93 | (0.91,0.94) | <0.001 |
| 2015                                 | 0.91      | (0.86,0.96) | <0.001 | 0.94      | (0.91,0.96) | <0.001 | 0.95      | (0.92,0.98) | 0.002  | 0.81 | (0.8,0.83)  | <0.001 |
| 2016                                 | 0.79      | (0.75,0.83) | <0.001 | 0.92      | (0.89,0.95) | <0.001 | 0.99      | (0.95,1.02) | 0.444  | 0.67 | (0.66,0.69) | <0.001 |
| 2017                                 | 0.78      | (0.74,0.82) | <0.001 | 0.89      | (0.86,0.92) | <0.001 | 0.95      | (0.91,0.99) | 0.009  | 0.55 | (0.54,0.56) | <0.001 |
| 2018                                 | 0.81      | (0.76,0.85) | <0.001 | 0.86      | (0.83,0.89) | <0.001 | 0.89      | (0.86,0.93) | <0.001 | 0.49 | (0.48,0.51) | <0.001 |
